# Supplementary material for: The Misalignment of the FT50 with the Achievement of the UN’s SDGs: A Call for Responsible Research Assessment by Business Schools
Source: MDPI journal article supplement (doi:10.3390/su14159598), 2022-08-04
Supplement: s1 [file s1]

**Table S1: Summary statistics highlighting the percent of 2019 published articles by journal that aligned with the descriptions of the dependent (SDG Alignment) and independent variables used in the OLS and Logit regressions.**

|                                                        | Articles<br>Analyzed | SDG<br>Alignment | Implicit<br>SDG<br>Content | Explicit<br>SDG<br>Content | Data<br>Origin<br>Outside<br>North<br>America | Qualitative<br>Content | Non-U.S.<br>Institution<br>Affiliation | Female<br>Primary<br>Authorship | BIPOC<br>Primary<br>Authorship | Time to<br>Article<br>Acceptance<br>(Months) | Time to<br>Article<br>Publication<br>(Months) |
|--------------------------------------------------------|----------------------|------------------|----------------------------|----------------------------|-----------------------------------------------|------------------------|----------------------------------------|---------------------------------|--------------------------------|----------------------------------------------|-----------------------------------------------|
| <i>Academy of Management Journal</i>                   | 69                   | 37.7%            | 53.8%                      | 46.2%                      | 53.6%                                         | 30.4%                  | 26.1%                                  | 42.0%                           | 39.1%                          | N/A                                          | N/A                                           |
| <i>Administrative Science Quarterly</i>                | 28                   | 32.1%            | 44.4%                      | 55.6%                      | 53.6%                                         | 53.6%                  | 32.1%                                  | 42.9%                           | 32.1%                          | N/A                                          | 14.75                                         |
| <i>Contemporary Accounting Research</i>                | 84                   | 7.1%             | 100.0%                     | 0.0%                       | 45.2%                                         | 10.7%                  | 17.9%                                  | 28.6%                           | 35.7%                          | N/A                                          | 8.85                                          |
| <i>Econometrica</i>                                    | 58                   | 27.6%            | 68.8%                      | 31.3%                      | 12.1%                                         | 3.4%                   | 31.0%                                  | 13.8%                           | 25.9%                          | 28.66                                        | N/A                                           |
| <i>Human Resource Management Journal</i>               | 37                   | 67.6%            | 64.0%                      | 36.0%                      | 75.7%                                         | 16.2%                  | 75.7%                                  | 40.5%                           | 27.0%                          | 15.95                                        | 4.59                                          |
| <i>Entrepreneurship Theory and Practice</i>            | 52                   | 26.9%            | 57.1%                      | 42.9%                      | 50.0%                                         | 9.6%                   | 46.2%                                  | 34.6%                           | 38.5%                          | N/A                                          | 12.75                                         |
| <i>Marketing Science</i>                               | 50                   | 6.0%             | 66.7%                      | 33.3%                      | 26.0%                                         | 6.0%                   | 6.0%                                   | 36.0%                           | 56.0%                          | 19.44                                        | 1.26                                          |
| <i>The Journal of The Academy of Marketing Science</i> | 73                   | 18.2%            | 78.6%                      | 21.4%                      | 53.4%                                         | 72.6%                  | 30.1%                                  | 32.9%                           | 52.1%                          | 13.83                                        | 2.66                                          |
| <i>The Review of Financial Studies</i>                 | 124                  | 16.1%            | 85.0%                      | 15.0%                      | 12.9%                                         | 2.4%                   | 22.6%                                  | 13.7%                           | 29.8%                          | N/A                                          | 7.87                                          |
| <i>Journal of Consumer Research</i>                    | 64                   | 17.2%            | 27.3%                      | 72.7%                      | 25.0%                                         | 9.4%                   | 31.3%                                  | 57.8%                           | 46.9%                          | N/A                                          | 9.22                                          |

|                                                             |     |       |        |       |       |       |       |       |       |       |       |
|-------------------------------------------------------------|-----|-------|--------|-------|-------|-------|-------|-------|-------|-------|-------|
| <i>Journal of Consumer Psychology</i>                       | 69  | 18.8% | 30.8%  | 69.2% | 10.1% | 30.4% | 21.7% | 58.0% | 42.0% | 12.46 | 6.01  |
| <i>The Accounting Review</i>                                | 87  | 24.1% | 90.5%  | 9.5%  | 94.3% | 12.6% | 9.2%  | 25.3% | 33.3% | 26.85 | 8.85  |
| <i>Journal of Financial and Quantitative Analysis</i>       | 82  | 19.5% | 100.0% | 0.0%  | 14.6% | 1.2%  | 31.7% | 15.9% | 45.1% | N/A   | 8.78  |
| <i>Journal of Marketing Research</i>                        | 60  | 6.7%  | 50.0%  | 50.0% | 5.0%  | 3.3%  | 15.0% | 28.3% | 48.3% | N/A   | 2.78  |
| <i>Research Policy</i>                                      | 193 | 48.2% | 54.8%  | 45.2% | 85.0% | 50.3% | 77.7% | 29.5% | 18.7% | 13.88 | 6.04  |
| <i>Journal of Finance</i>                                   | 95  | 12.6% | 83.3%  | 16.7% | 22.1% | 6.3%  | 17.9% | 10.5% | 20.0% | 29.93 | 3.63  |
| <i>MIS Quarterly</i>                                        | 58  | 24.1% | 78.6%  | 21.4% | 41.4% | 13.8% | 25.9% | 32.8% | 53.4% | N/A   | N/A   |
| <i>Journal of Business Venturing</i>                        | 50  | 34.0% | 64.7%  | 35.3% | 58.0% | 10.0% | 42.0% | 24.0% | 42.0% | 13.0  | 6.70  |
| <i>American Economic Review</i>                             | 127 | 22.0% | 75.0%  | 25.0% | 38.6% | 14.2% | 17.3% | 14.2% | 23.6% | N/A   | N/A   |
| <i>Journal of Management Studies</i>                        | 76  | 31.6% | 87.5%  | 12.5% | 36.8% | 21.1% | 48.7% | 44.7% | 21.1% | N/A   | 9.18  |
| <i>Information Systems Research</i>                         | 75  | 6.7%  | 100.0% | 0.0%  | 49.3% | 12.0% | 16.0% | 25.3% | 78.7% | 28.60 | N/A   |
| <i>Journal of Management</i>                                | 135 | 22.2% | 76.7%  | 23.3% | 45.2% | 17.8% | 23.7% | 34.8% | 33.3% | N/A   | 15.30 |
| <i>Journal of Operations Management</i>                     | 51  | 51.0% | 46.2%  | 53.8% | 35.3% | 13.7% | 37.3% | 11.8% | 43.1% | 17.33 | 3.16  |
| <i>Organizational Behavior and Human Decision Processes</i> | 50  | 20.0% | 90.0%  | 10.0% | 32.0% | 4.0%  | 22.0% | 42.0% | 24.0% | 19.46 | 2.14  |
| <i>Organization Studies</i>                                 | 115 | 51.3% | 44.1%  | 55.9% | 79.1% | 89.6% | 83.5% | 48.7% | 9.6%  | N/A   | 11.47 |

|                                                                                |     |       |        |       |       |       |       |       |       |       |       |
|--------------------------------------------------------------------------------|-----|-------|--------|-------|-------|-------|-------|-------|-------|-------|-------|
| Management Science                                                             | 296 | 23.0% | 61.8%  | 38.2% | 16.9% | 8.4%  | 22.3% | 22.0% | 46.3% | 18.65 | 8.40  |
| Accounting, Organizations, and Society                                         | 35  | 34.3% | 83.3%  | 16.7% | 54.3% | 40.0% | 60.0% | 14.3% | 22.9% | 23.57 | 5.43  |
| Human Relations Journal of Accounting and Economics                            | 117 | 35.9% | 23.8%  | 76.2% | 81.2% | 75.2% | 78.6% | 58.1% | 21.4% | N/A   | 10.21 |
| Journal of Applied Psychology                                                  | 43  | 16.3% | 100.0% | 0.0%  | 9.3%  | 4.7%  | 4.7%  | 27.9% | 46.5% | 21.33 | 4.14  |
| Organization Science                                                           | 82  | 26.8% | 63.6%  | 36.4% | 36.6% | 79.3% | 17.1% | 41.5% | 30.5% | 18.11 | 5.56  |
| Production and Operations Management Journal of International Business Studies | 64  | 17.2% | 63.6%  | 36.4% | 35.9% | 67.2% | 31.3% | 34.4% | 21.9% | 24.91 | 1.47  |
| Journal of Financial Economics                                                 | 195 | 24.6% | 72.9%  | 27.1% | 17.9% | 8.2%  | 27.7% | 25.6% | 65.1% | 17.19 | 5.43  |
| Review of Accounting Studies                                                   | 101 | 12.9% | 84.6%  | 15.4% | 27.7% | 14.9% | 46.5% | 22.8% | 41.6% | 13.58 | 6.25  |
| Journal of Management Information Systems                                      | 134 | 16.4% | 81.8%  | 18.2% | 16.4% | 55.2% | 26.1% | 12.7% | 32.8% | 11.37 | 5.60  |
| Journal of Political Economy                                                   | 42  | 9.5%  | 100.0% | 0.0%  | 11.9% | 2.4%  | 11.9% | 4.8%  | 21.4% | N/A   | 3.79  |
| The Review of Economic Studies                                                 | 43  | 11.6% | 100.0% | 0.0%  | 23.3% | 20.9% | 27.9% | 20.9% | 60.5% | N/A   | N/A   |
| Review of Finance                                                              | 70  | 25.7% | 88.9%  | 11.1% | 31.4% | 60.0% | 11.4% | 12.9% | 11.4% | N/A   | 6.63  |
|                                                                                | 77  | 31.2% | 58.3%  | 41.7% | 70.1% | 20.8% | 20.8% | 10.4% | 24.7% | 32.73 | 10.73 |
|                                                                                | 33  | 6.1%  | 50.0%  | 50.0% | 36.4% | 15.2% | 51.5% | 15.2% | 45.5% | 15.88 | 11.85 |

|                                                        |              |              |              |              |              |              |              |              |              |              |             |
|--------------------------------------------------------|--------------|--------------|--------------|--------------|--------------|--------------|--------------|--------------|--------------|--------------|-------------|
| <i>Journal of Marketing</i>                            | 45           | 13.3%        | 50.0%        | 50.0%        | 48.9%        | 66.7%        | 24.4%        | 46.7%        | 37.8%        | N/A          | 2.42        |
| <i>Harvard Business Review</i>                         | 159          | 9.4%         | 60.0%        | 40.0%        | 0.0%         | 54.7%        | 34.6%        | 22.0%        | 10.7%        | N/A          | N/A         |
| <i>Manufacturing and Service Operations Management</i> | 53           | 35.8%        | 63.2%        | 36.8%        | 9.4%         | 18.9%        | 13.2%        | 32.1%        | 73.6%        | 15.02        | 9.48        |
| <i>Sloan Management Review</i>                         | 65           | 16.9%        | 90.9%        | 9.1%         | 10.8%        | 50.8%        | 27.7%        | 20.0%        | 10.8%        | N/A          | N/A         |
| <i>Operations Research</i>                             | 96           | 13.5%        | 30.8%        | 69.2%        | 3.1%         | 53.1%        | 17.7%        | 16.7%        | 41.7%        | 23.43        | 0.86        |
| <i>Journal of Business Ethics</i>                      | 535          | 48.1%        | 57.4%        | 42.6%        | 60.7%        | 55.3%        | 65.8%        | 34.4%        | 32.1%        | 10.57        | 19.38       |
| <i>Strategic Entrepreneurship Journal</i>              | 24           | 16.7%        | 75.0%        | 25.0%        | 41.7%        | 75.0%        | 45.8%        | 20.8%        | 20.8%        | 23.43        | 4.83        |
| <i>The Quarterly Journal of Economics</i>              | 40           | 60.0%        | 62.5%        | 37.5%        | 27.5%        | 20.0%        | 15.0%        | 7.5%         | 17.5%        | N/A          | 5.03        |
| <i>Journal of Accounting Research</i>                  | 30           | 3.3%         | 100.0%       | 0.0%         | 20.0%        | 16.7%        | 13.3%        | 36.7%        | 36.7%        | 23.67        | 4.33        |
| <i>The Academy of Management Review</i>                | 58           | 50.0%        | 51.7%        | 44.8%        | 22.4%        | 98.3%        | 34.5%        | 29.3%        | 25.9%        | N/A          | N/A         |
| <i>Strategic Management Journal</i>                    | 123          | 20.3%        | 76.0%        | 24.0%        | 29.3%        | 21.1%        | 29.3%        | 24.4%        | 39.8%        | 20.67        | 4.36        |
| <b>Total/Mean</b>                                      | <b>4,522</b> | <b>27.0%</b> | <b>62.9%</b> | <b>37.1%</b> | <b>36.5%</b> | <b>32.9%</b> | <b>31.4%</b> | <b>28.2%</b> | <b>34.7%</b> | <b>19.77</b> | <b>6.88</b> |

**Table S2: Summary statistics highlighting the percent of 2019 published articles by journal discipline that aligned with the descriptions of the dependent (SDG Alignment) and independent variables used in the OLS and Logit regressions.**

|                                                                     | <i>Articles<br/>Analyzed</i> | <i>SDG<br/>Alignment</i> | <i>Implicit<br/>Content</i> | <i>Explicit<br/>Content</i> | <i>Data<br/>Origin<br/>Outside<br/>North<br/>America</i> | <i>Qualitative<br/>Content</i> | <i>Non-U.S.<br/>Institution<br/>Affiliation</i> | <i>Female<br/>Primary<br/>Authorship</i> | <i>BIPOC<br/>Primary<br/>Authorship</i> | <i>Average<br/>Time to<br/>Acceptance<br/>(Months)</i> | <i>Average<br/>Time to<br/>Publication<br/>(Months)</i> |
|---------------------------------------------------------------------|------------------------------|--------------------------|-----------------------------|-----------------------------|----------------------------------------------------------|--------------------------------|-------------------------------------------------|------------------------------------------|-----------------------------------------|--------------------------------------------------------|---------------------------------------------------------|
| <i>Economic</i>                                                     | 506                          | 26.1%                    | 72.0%                       | 28.0%                       | 32.6%                                                    | 31.6%                          | 20.7%                                           | 12.5%                                    | 24.3%                                   | 24.25                                                  | 7.00                                                    |
| <i>Ethics</i>                                                       | 535                          | 48.1%                    | 57.4%                       | 42.6%                       | 60.8%                                                    | 55.4%                          | 65.8%                                           | 34.3%                                    | 32.1%                                   | 10.57                                                  | 19.38                                                   |
| <i>Finance &amp;<br/>Accounting</i>                                 | 655                          | 15.4%                    | 90.1%                       | 9.9%                        | 21.7%                                                    | 8.7%                           | 21.8%                                           | 18.5%                                    | 32.8%                                   | 23.54                                                  | 6.75                                                    |
| <i>Magazines</i>                                                    | 224                          | 11.6%                    | 73.1%                       | 26.9%                       | 3.1%                                                     | 53.6%                          | 32.6%                                           | 21.4%                                    | 10.7%                                   | N/A                                                    | N/A                                                     |
| <i>Management,<br/>Human<br/>Resources, &amp;<br/>Organizations</i> | 1,361                        | 33.1%                    | 57.0%                       | 43.0%                       | 48.3%                                                    | 38.4%                          | 45.2%                                           | 34.8%                                    | 29.8%                                   | 18.92                                                  | 7.99                                                    |
| <i>Marketing &amp;<br/>Consumer<br/>Behaviour</i>                   | 443                          | 16.5%                    | 53.4%                       | 46.6%                       | 29.3%                                                    | 40.6%                          | 21.2%                                           | 43.1%                                    | 44.2%                                   | 15.96                                                  | 4.27                                                    |
| <i>Operations &amp;<br/>Entrepreneurship</i>                        | 798                          | 22.3%                    | 65.7%                       | 34.3%                       | 28.2%                                                    | 19.2%                          | 30.0%                                           | 24.3%                                    | 54.1%                                   | 18.94                                                  | 6.18                                                    |

**Table S3: Table of Results from the Ordinary Least Squares (OLS) regression model**

OLS Model Coefficients

|                                                 | Coefficient<br>Estimate ( $\beta$ ) | Standard Error<br>(S.E.) | T-Value | P-Value<br>(p) |      |
|-------------------------------------------------|-------------------------------------|--------------------------|---------|----------------|------|
| <b>Intercept</b>                                | 0.448594                            | 0.041412                 | 10.833  | < 2e-16        | **** |
| <b>Qualitative Content</b>                      | 0.041141                            | 0.014861                 | 2.768   | 0.00566        | ***  |
| <b>Primary Authorship</b>                       |                                     |                          |         |                |      |
| Female                                          | 0.070679                            | 0.014508                 | 4.872   | 1.14e-06       | **** |
| BIPOC                                           | 0.005675                            | 0.014234                 | 0.399   | 0.69014        |      |
| <b>U.S. Institution Affiliation</b>             | -0.030583                           | 0.015079                 | -2.028  | 0.04261        | **   |
| <b>Time to Publication</b>                      |                                     |                          |         |                |      |
| 0-6 Months                                      | 0.009209                            | 0.023043                 | 0.400   | 0.68946        |      |
| 7-12 Months                                     | 0.022428                            | 0.025063                 | 0.895   | 0.37091        |      |
| 13-18 Months                                    | 0.055040                            | 0.030627                 | 1.797   | 0.07239        | *    |
| 19-24 Months                                    | -0.003951                           | 0.037983                 | -0.104  | 0.91716        |      |
| 25+ Months                                      | -0.038509                           | 0.064078                 | -0.601  | 0.54789        |      |
| <b>Journal Disciplines</b>                      |                                     |                          |         |                |      |
| Economic                                        | -0.172902                           | 0.036405                 | -4.749  | 2.10e-06       | **** |
| Finance & Accounting                            | -0.276855                           | 0.035309                 | -7.841  | 5.55e-15       | **** |
| Magazine                                        | -0.310352                           | 0.046664                 | -6.651  | 3.27e-11       | **** |
| Management, Human<br>Resources, & Organizations | -0.142163                           | 0.030498                 | -4.661  | 3.23e-06       | **** |
| Marketing & Consumer<br>Behaviour               | -0.295440                           | 0.036171                 | -8.168  | 4.04e-16       | **** |
| Operations &<br>Entrepreneurship                | -0.216864                           | 0.033802                 | -6.416  | 1.55e-10       | **** |
| <b>Data Origin</b>                              |                                     |                          |         |                |      |
| North America                                   | -0.040264                           | 0.019654                 | -2.049  | 0.04055        | **   |
| Europe                                          | 0.021923                            | 0.025393                 | 0.863   | 0.38799        |      |
| Asia/Oceania                                    | 0.006195                            | 0.028897                 | 0.214   | 0.83025        |      |

Note: \*\*\*\*, \*\*\*, \*\*, \* represent 0.1%, 1%, 5%, and 10% level of significance respectively.
