# Supplementary material for: The Misalignment of the FT50 with the Achievement of the UN’s SDGs: A Call for Responsible Research Assessment by Business Schools
Source: MDPI journal article supplement (doi:10.3390/su14159598), 2022-08-04
Supplement: s1 [file s1]

Archive with 1 entries (1 files):
- sustainability-1820208-supplementary.pdf
